# Supplementary material
Source: MDPI journal article supplement (https://www.mdpi.com/2039-4713/14/1/25)
Supplement: s1 [file s1]

# Supplementary Materials: An Exploratory Investigation of Organic Chemicals Detected in Baby Teeth: Differences in Children with and without Autism

Raymond F. Palmer

**Table S1.** Chemical function and product usage.

| Variable. |                                                                           |                                                                                                                                                                                                                                                                                                                                                                                                                                                                                          |
|-----------|---------------------------------------------------------------------------|------------------------------------------------------------------------------------------------------------------------------------------------------------------------------------------------------------------------------------------------------------------------------------------------------------------------------------------------------------------------------------------------------------------------------------------------------------------------------------------|
| Chem1     | Phthalate Isomer: 4, 5 and 7<br>CAS: 0-00-0                               | Androgen antagonist that suppresses the action of male sex hormones (e.g., testosterone), endocrine disrupting chemicals. These <b>phthalates</b> are part of the family of compounds used extensively in medical, automotive, and cosmetics production. <b>plasticizers</b> for PVC paste, pulp mixtures and as an additive in processing various products including soles for shoes, synthetic leather, waterproof membranes, paints, varnishes, floor coverings, door mats and hoses. |
| Chem2     | Phthalate Isomer:5<br>CAS: 0-00-0                                         |                                                                                                                                                                                                                                                                                                                                                                                                                                                                                          |
| Chem3     | Phthalate Isomer:4<br>CAS: 0-00-0                                         |                                                                                                                                                                                                                                                                                                                                                                                                                                                                                          |
| Chem4     | Tris(2,4-di-tert-butylphenyl) phosphate<br>CAS: 95906-11-9                | Organophosphorous compound for processing stabilizers for polymers. Flame retardant, <b>plasticizer</b> , lubricant additive, synthesis for rubber, coatings, and adhesives.                                                                                                                                                                                                                                                                                                             |
| Chem5     | tri(2-Ethylhexyl) trimellitate<br>CAS: 3319-31-1                          | PVC <b>plasticizer</b> for wire and cable insulation and interior automotive.                                                                                                                                                                                                                                                                                                                                                                                                            |
| Chem6     | Tonalid<br>CAS: 21145-77-7                                                | Synthetic musk <b>fragrant</b> , chemical constituent of personal care products, enters body through dermal contact.                                                                                                                                                                                                                                                                                                                                                                     |
| Chem7     | Salicylic acid, 2-methylpropyl ether, 2-methylpropyl ester<br>CAS: 0-00-0 | Skin medication for acne or wart treatment. Food additives containing phenols/salicylates are problematic for a subset of children and people with autism. Intolerance to Salicylate is linked to attentional problems, hyperactivity, mood and anxiety disorders-potentially through sulfation metabolism.                                                                                                                                                                              |
| Chem8     | Phenylmethanediol dibutanoate<br>CAS: 2929-77-3                           | Short-lived intermediate in some chemical reactions                                                                                                                                                                                                                                                                                                                                                                                                                                      |
| Chem9     | Phenol, 2,4-di-t-butyl-6-nitro-<br>CAS: 20039-94-5                        | Used as stabilizers, free-radical scavengers and antioxidants in technical applications, such as in fuels, hydraulic fluids and lubricating oils, as well as in elastomeric and thermoplastic <b>polymers</b> .                                                                                                                                                                                                                                                                          |
| Chem10    | Phenanthrene / Anthracene (co-elute)<br>CAS: 85-01-8                      | Use to make dyes, <b>plastics</b> , and <b>pesticides</b> , explosives, and drugs. Also found in particle emissions from natural gas combustion and municipal incinerator waste. Particulates are present in ambient air pollution near high vehicular traffic and industrial or urban areas (ATSDR, 1995; Fang et al., 2006; Rehwagen et al., 2005).                                                                                                                                    |
| Chem11    | Oxime-, methoxy-phenyl-<br>CAS: 0-00-0                                    | anti-bacterial properties, found in melons, an aromatic                                                                                                                                                                                                                                                                                                                                                                                                                                  |
| Chem12    | Octyl methoxycinnamate<br>CAS: 5466-77-3                                  | primarily used in sunscreens and other cosmetics to absorb UV-B rays from the sun, protecting the skin from damage.                                                                                                                                                                                                                                                                                                                                                                      |
| Chem13    | n-Hexyl salicylate<br>CAS: 6259-76-3                                      | washing & cleaning products, air care products, polishes and waxes, cosmetics and personal care products and biocides (e.g. disinfectants, pest control products)                                                                                                                                                                                                                                                                                                                        |
| Chem14    | Methyl dehydroabietate<br>CAS: 1235-74-1                                  | An adhesive in food packaging. Viscosity control in emollients. Used in the preparation of <b>antimicrobials</b> , cosmetics, skin conditioners,                                                                                                                                                                                                                                                                                                                                         |

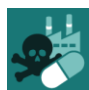

|        |                                                                           |                                                                                                                                                                                                                                                                                                                                                                                                                                                              |
|--------|---------------------------------------------------------------------------|--------------------------------------------------------------------------------------------------------------------------------------------------------------------------------------------------------------------------------------------------------------------------------------------------------------------------------------------------------------------------------------------------------------------------------------------------------------|
| Chem15 | Limonene<br>CAS: 5989-54-8                                                | Major component in the oil of citrus fruit peels. a <b>flavoring</b> . Used in cosmetics, foods, cleaning products and <b>pesticides</b> . In foods, beverages, and chewing gum,                                                                                                                                                                                                                                                                             |
| Chem16 | Formamide, N,N-diethyl-<br>CAS: 617-84-5                                  | An amide derived from formic acid, used as a chemical feedstock in the manufacture of pharmaceuticals, herbicides, <b>pesticides</b> and other chemical substances as an intermediate <b>solvent</b> . <i>Neurotoxin - Acute solvent syndrome</i>                                                                                                                                                                                                            |
| Chem17 | Formamide, N,N-dibutyl-<br>CAS: 761-65-9                                  |                                                                                                                                                                                                                                                                                                                                                                                                                                                              |
| Chem18 | Ethanol, 2-phenoxy-<br>CAS: 122-99-6                                      | a <b>solvent</b> for dyes, inks, and resins; a lubricant preservative; and a reagent in organic chemical synthesis. a preservative for cosmetics and drugs, a fixative for perfumes to an attractant in <b>insecticides</b> . Exposure to phenoxyethanol has been linked to reactions ranging from eczema to severe, life-threatening allergic reactions. Infant oral exposure to phenoxyethanol can acutely affect nervous system function.                 |
| Chem19 | DINP Isomer (Uncalibrated)<br>Diisononyl phthalate   CAS: A<br>0-00-0     | A <b>plasticizer</b> , especially in the production of polyvinyl chloride (PVC).                                                                                                                                                                                                                                                                                                                                                                             |
| Chem20 | Diisopropyl adipate   CAS:<br>6938-94-9                                   | A non-occlusive, non-oily, light emollient with excellent spreading properties. Used in bath oils, safe for use in cosmetics and personal care products.                                                                                                                                                                                                                                                                                                     |
| Chem21 | Cyclopentaneacetic acid, 3-oxo-2-pentyl-, methyl ester<br>CAS: 24851-98-7 | Chemical intermediate. A kind of preparation method of natural fresh flower and fruit <b>flavor</b> essence.<br>Secondary alicyclic saturated and unsaturated alcohols, ketones and esters containing secondary alicyclic alcohols from phenol carboxylic acids                                                                                                                                                                                              |
| Chem22 | Butyl benzoate<br>CAS: 136-60-7                                           | perfume ingredient and as a <b>solvent</b> for cellulose ether, a dye carrier for textiles. It has a role as an <b>antimicrobial food preservative</b> ,                                                                                                                                                                                                                                                                                                     |
| Chem23 | Benzothiazole (or 1,2-Benzisothiazole<br>CAS 272-16-2)<br>CAS: 95-16-9    | pharmaceutical drug that possesses many attractive biological activities. It has <b>antibacterial</b> , <b>anticonvulsant</b> , anticancer , <b>antifungal</b> , <b>antimitotic</b> , and <b>antitumor drugs</b> Some benzothiazole derivatives are highly useful as <b>insecticides</b> and herbicides.                                                                                                                                                     |
| Chem24 | Benzoic acid, 2-propenyl ester<br>CAS: 583-04-0                           | Ingredient in perfumes and artificial fruit- <b>flavoring agents</b> .                                                                                                                                                                                                                                                                                                                                                                                       |
| Chem25 | Benzeneacetaldehyde<br>CAS: 122-78-1                                      | An intermediate in the manufacture of chemicals, <b>perfumes</b> , aniline dyes, <b>plastics</b> , synthetic rubber and in some fuel compounds.                                                                                                                                                                                                                                                                                                              |
| Chem26 | Benzamide, N-propyl-<br>CAS: 10546-70-0                                   | Metabolite observed in cancer metabolism                                                                                                                                                                                                                                                                                                                                                                                                                     |
| Chem27 | Benzaldehyde, 4-propyl-<br>CAS: 28785-06-0                                | For experimental research in food science <b>flavorings</b>                                                                                                                                                                                                                                                                                                                                                                                                  |
| Chem28 | Acetamide, N,N-dibutyl-<br>CAS: 1563-90-2                                 | <b>Flavoring</b> agent or adjuvant.                                                                                                                                                                                                                                                                                                                                                                                                                          |
| Chem29 | 8-Hydroxycarvotanacetone<br>CAS: 7712-46-1                                | Extractant in essential oils                                                                                                                                                                                                                                                                                                                                                                                                                                 |
| Chem30 | 4-Benzyloxybenzoic acid<br>CAS: 1486-51-7                                 | An important class of <b>preservatives</b> extensively used in the cosmetic and pharmaceutical industries for preparing shampoos, commercial moisturizers, shaving gels, personal lubricants, topical/parenteral pharmaceuticals, spray tanning solutions, and toothpaste.                                                                                                                                                                                   |
| Chem31 | 2-Pyrrolidinone<br>CAS: 616-45-5                                          | A variety of pharmaceutical drugs including cotinine, doxapram, povidone, and ethosuximide, and the racetams. Used in inkjet cartridges. <i>May damage the fetus</i> . Widely used organic polar solvent for various applications. 2-Pyrrolidinone is also an intermediate in the manufacture of polymers. widely exists in various physiologically active natural products in nature. For example, it is the main structural unit of gonadotropin releasing |



|        |                                                                                                           |                                                                                                                                                                                                                                                                                                                                                                                                |
|--------|-----------------------------------------------------------------------------------------------------------|------------------------------------------------------------------------------------------------------------------------------------------------------------------------------------------------------------------------------------------------------------------------------------------------------------------------------------------------------------------------------------------------|
|        |                                                                                                           | hormone. At the same time, 2-pyrrolidone is an important raw material and intermediate of medicine, pesticide, dye, peptide and other chemicals. If it is used as the end chain of peptide, it also plays a stable role in the conformation of the compound. Many polysubstituted 2-pyrrolidones have been used in the synthesis and production of a variety of drugs and applied for patents. |
| Chem32 | 2-Phenoxyethyl isobutyrate<br>CAS: 103-60-6                                                               | <b>Flavoring and fragrant intermediary</b> agent and <b>solvent</b> for pharmaceuticals.                                                                                                                                                                                                                                                                                                       |
| Chem33 | 2,4-Di-tert-butylphenol<br>CAS: 96-76-4                                                                   | UV stabilizers as well as antioxidants for hydrocarbon-based products .varying from petrochemicals to <b>plastics</b> .                                                                                                                                                                                                                                                                        |
| Chem34 | 1-Cyclohexene-1-carboxylic acid, 4-(1,5-dimethyl-3-oxohexyl)-, methyl ester, [S-(R*,R*)]- CAS: 26462-72-6 | not a well-known or widely used chemical.                                                                                                                                                                                                                                                                                                                                                      |
| Chem35 | 1,2-Propanedione, 1-phenyl-, 2-oxime   CAS: 119-51-7                                                      | <b>flavor and fragrance</b> materials and pharmaceutical intermediates.                                                                                                                                                                                                                                                                                                                        |
| Chem36 | 1,1'-Biphenyl, 2,2'-diethyl-<br>CAS: 13049-35-9                                                           | A benzenoid aromatic compound occurs naturally in coal tar, crude oil, and natural gas. Formerly used as a <b>fungicide</b> for citrus crops. An <b>antimicrobial food preservative</b> and an <b>antifungal</b> agrochemical.                                                                                                                                                                 |
| Chem37 | Ethanol, 2-(2-butoxyethoxy)-<br>CAS: 112-34-5                                                             | <b>Solvent</b> /Alcohol/Ether, Glycol Ether.                                                                                                                                                                                                                                                                                                                                                   |
| Chem38 | Butylated Hydroxytoluene<br>CAS: 128-37-0                                                                 | Preservative food additive and antioxidant .                                                                                                                                                                                                                                                                                                                                                   |
| Chem39 | Benzophenone<br>CAS: 119-61-9                                                                             | A photo initiator for Ultra-violet curing applications with inks, imaging, and clear coatings in the printing industry. Prevents UV light from damaging scents and colors in products-perfumes and soaps. <i>PAN bad actor*</i>                                                                                                                                                                |
| Chem40 | Phenol, 4-(1,1-dimethylpropyl)-<br>CAS: 80-46-6                                                           | <b>Microbiocide</b> Phenol.<br><i>PAN bad actor*</i>                                                                                                                                                                                                                                                                                                                                           |
| Chem41 | Phenol, p-tert-butyl- (or positional isomer)<br>CAS: 98-54-4                                              | <b>Microbiocide</b> , Phenol .                                                                                                                                                                                                                                                                                                                                                                 |
| Chem42 | Phenol, 4-chloro-3-methyl-:<br>CAS: 59-50-7                                                               | <b>Microbiocide</b> , Fungicide, Chlorinated Phenol.<br><i>PAN bad actor*</i>                                                                                                                                                                                                                                                                                                                  |
| Chem43 | Homosalate CAS: 118-56-9                                                                                  | <b>Insecticide</b> , Fungicide, Microbiocide, Benzoic acid.                                                                                                                                                                                                                                                                                                                                    |
| Chem44 | Benzyl alcohol<br>CAS: 100-51-6                                                                           | <b>Insecticide</b> , Fungicide.                                                                                                                                                                                                                                                                                                                                                                |
| Chem45 | 2-Ethylhexyl salicylate<br>CAS: 118-60-5                                                                  | <b>Insecticide</b> .                                                                                                                                                                                                                                                                                                                                                                           |
| Chem46 | Dibutyl phthalate<br>CAS: 84-74-2                                                                         | Insect Repellent, <b>Insecticide</b> . <i>PAN bad actor*</i>                                                                                                                                                                                                                                                                                                                                   |
| Chem47 | 1,2-Benzenedicarboxylic acid, bis(2-methylpropyl) ester<br>CAS: 84-69-5                                   | Insect Repellent, <b>Insecticide</b> .                                                                                                                                                                                                                                                                                                                                                         |
| Chem48 | Diethyltoluamide<br>CAS: 134-62-3                                                                         | <b>DEET</b> , Insect Repellent.                                                                                                                                                                                                                                                                                                                                                                |
| Chem49 | Cholesterol CAS: 57-88-5                                                                                  | Steroid                                                                                                                                                                                                                                                                                                                                                                                        |



|        |                                                                              |                                                                                                                                                                                                                                                                                           |
|--------|------------------------------------------------------------------------------|-------------------------------------------------------------------------------------------------------------------------------------------------------------------------------------------------------------------------------------------------------------------------------------------|
| Chem50 | Caprolactam<br>CAS: 105-60-2                                                 | nylon 6 fibers and resins and nylon 6 <b>polymer</b> used in synthetic fibers, textile, carpet, and industrial yarn industries.                                                                                                                                                           |
| Chem51 | 2-Propenoic acid, 3-(4-methoxyphenyl)-, 2-ethylhexyl ester<br>CAS: 5466-77-3 | UV absorber and UV filter in sunscreens.                                                                                                                                                                                                                                                  |
| Chem52 | Valproic Acid CAS: 99-66-1                                                   | Anticonvulsant drug. Also used for treating migraine headaches and manic episodes in bipolar disorder, potentially through increasing gamma-aminobutyric acid (GABA) in the brain. When taken during pregnancy, has also been linked to increased risk for autism. <i>Pan Bad Actor</i> * |
| Chem53 | 2-Pyrrolidinone, 1-methyl-<br>CAS: 872-50-4                                  | Chemical <b>intermediate</b> , Electronics production, Food additive, Fuel or fuel additive, <b>Solvent</b>                                                                                                                                                                               |
| Chem54 | Ethanol, 2-(2-ethoxyethoxy)-<br>CAS: 111-90-0                                | <b>Solvent</b> /Adjuvant                                                                                                                                                                                                                                                                  |

\*Note: To identify the most toxic set of pesticides, the Pesticide Action Network (PAN) created the term PAN Bad Actor. These pesticides are at least a known or probable carcinogen, a reproductive or developmental toxicants, a neurotoxic cholinesterase inhibitor, a known groundwater contaminant, or a pesticide with high acute toxicity.,
